# Supplementary material
Source: publisher site journal article supplement (https://www.dovepress.com/article/268905)
Supplement: Supplementary file 1 [file get_supplementary_file.php]

**Supplemental data**

**Title**

First-line treatment with tiotropium/olodaterol improves physical activity in patients with treatment-naïve chronic obstructive pulmonary disease

Koichiro Takahashi MD, PhD, Masaru Uchida MD, PhD, Go Kato MD, PhD, Ayako Takamori PhD, Takashi Kinoshita MD, PhD, Makoto Yoshida MD, PhD, Ryo Tajiri MMS, Keisuke Kojima MD, PhD, Hiroshi Inoue MD, Hiromi Kobayashi MD, PhD, Hironori Sadamatsu MD, Hiroki Tashiro MD, PhD, Masahide Tanaka MD, Shinichiro Hayashi MD, PhD, Atsushi Kawaguchi PhD, Shinya Kimura MD, PhD, Naoko Sueoka-Aragane MD, PhD, Tomotaka Kawayama MD, PhD: Saga-naïve COPD Physical Activity Evaluation (SCOPE) Study Investigator Group

Table S1. The list of Investigator, site, and IRB

| Investigator name | Site name (location) | IRB | Approval date |
| --- | --- | --- | --- |
|  | (location) | (location) | (number) |
| Koichiro Takahashi | Saga University | Same as on the left | 6, March, 2017 |
|  | (Saga, Japan) |  | (2016-12-01) |
| Masaru Uchida | Saga Central Hospital | Same as on the left | 14, April, 2017 * |
|  | (Saga, Japan) |  |  |
| Go Kato | Saga Prefectural Medical Center | Same as on the left | 28, March, 2017 |
|  | (Saga, Japan) |  | (17-04-01-05) |
| Makoto Yoshida | Fukuoka Hospital | Same as on the left | 27, April, 2017 |
|  | (Fukuoka, Japan) |  | (F29-1) |
| Tomotaka Kawayama | Kurume University | Same as on the left | 15, May, 2017 |
|  | (Fukuoka, Japan) |  | (17029) |
| Shinichiro Hayashi | Kouhoukai Takagi Hospital | Same as on the left | 7, August, 2017 |
|  | (Fukuoka, Japan) |  | (255) |
| Hiroshi Inoue | Karatsu Red Cross Hospital | Same as on the left | 12, January, 2018 |
|  | (Saga, Japan) |  | (9-1) |
| Keisuke Kojima | Imari Arita Kyouritsu Hospital | Same as on the left | 14, March, 2018 |
|  | (Saga, Japan) |  | (29-20) |
| Hiromi Kobayashi | East Saga Hospital | Same as on the left | 30, March, 2018 |
|  | (Saga, Japan) |  | (29-22) |
| Note: * No reference number on the approval letter from IRB. | | |  |
| Abbreviation: IRB; institutional review board | |  |  |

Table S2. Six-minute walk test

|  | Tio/Olo | Tio | p-value |
| --- | --- | --- | --- |
| At entry (0 weeks) |  |  |  |
| 6MWD (m) | 470.3 (77.6) | 438.8 (88.1) | 0.11 |
| Borg scale (dyspnea), median (25–75% quantile) | 3 (0.5–4) | 2 (0–4) | 0.57 |
| Borg scale (fatigue), median (25–75% quantile) | 1 (0–3) | 0.5 (0–3.5) | 0.70 |
| After treatment (12 weeks) |  |  |  |
| 6MWD (m) | 475.7 (68.7) | 445.7 (80.6) | 0.10 |
| Borg scale (dyspnea), median (25–75% quantile) | 3 (1–4) | 2 (0.5–3) | 0.13 |
| Borg scale (fatigue), median (25–75% quantile) | 1.5 (0–3) | 0.5 (0–3) | 0.13 |
| Abbreviations: Tio/Olo; tiotropium/olodaterol, Tio; tiotropium, 6MWD; 6-minute walk distance | | | |

Note: p-values were estimated using the t-test or Wilcoxon's rank sum test.

Table S3. Adverse events

|  | Tio/Olo  (n=37) | Tio  (n=37) |
| --- | --- | --- |
| AE, n (%) |  |  |
| Any AE | 11 (29.7) | 9 (24.3) |
| Severe AE | 0 (0) | 0 (0) |
| Drug-related AE | 3 (8.1) | 4 (10.8) |
| AE with an incidence |  |  |
| Upper respiratory tract infection | 1 (2.7) | 2 (5.4) |
| Cough | 4 (10.8) | 2 (5.4) |
| Sputum | 0 (0) | 1 (2.7) |
| Oral dryness | 3 (8.1) | 3 (8.1) |
| Abbreviations: AE; adverse events, Tio/Olo; tiotropium/olodaterol, Tio; tiotropium | | |
